# Supplementary material for: Bladder cancer cell‐intrinsic PD‐L1 signals promote mTOR and autophagy activation that can be inhibited to improve cytotoxic chemotherapy
Source: PubMed Central journal article supplement (PMC7957205; doi:10.1002/cam4.3739), 2021-02-24
Supplement: CAM4-10-2137-s001.pdf [file CAM4-10-2137-s001.pdf]

# Supplementary Fig 1

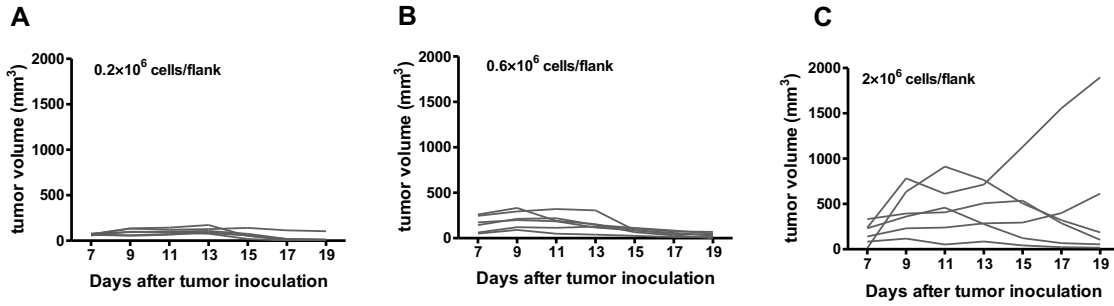

Supplementary Figure 1. In vivo growth failure of PD-L1<sup>KO</sup> MB49 bladder cancer cells. *In vivo* challenge of 0.2 x 10<sup>6</sup> (A), 0.6 x 10<sup>6</sup> (B), and 2 x 10<sup>6</sup> (C) cells PD-L1<sup>KO</sup> MB49 cells (clone 18) all failed to reliably produce SQ tumors in WT C57Bl6 mice.
